# Supplementary material for: A repressor-decay timer for robust temporal patterning in embryonic Drosophila neuroblast lineages
Source: eLife journal article supplement (doi:10.7554/elife.38631), 2018-12-10
Supplement: supp [file elife-38631-supp-v1.zip]

Archive with 11 entries (11 files):
- elife_poa_e38631_Figure_3_figure_supplement_1.tif
- elife_poa_e38631_Figure_2_figure_supplement_1.tif
- elife_poa_e38631_Figure_4_figure_supplement_1.tif
- elife_poa_e38631_Supplementary_File_1.docx
- elife_poa_e38631_Supplementary_File_4.docx
- elife_poa_e38631_Transparent_Reporting_File.pdf
- elife_poa_e38631_Figure_5_figure_supplement_2.tif
- elife_poa_e38631_Figure_5_figure_supplement_1.jpg
- elife_poa_e38631_Supplementary_File_3.docx
- elife_poa_e38631_Figure_2_figure_supplement_2.tif
- elife_poa_e38631_Supplementary_File_2.docx
