# Supplementary material for: A repressor-decay timer for robust temporal patterning in embryonic Drosophila neuroblast lineages
Source: eLife journal article supplement (doi:10.7554/elife.38631), 2018-12-10
Supplement: supp [file elife-38631-supp-v1.zip › elife_poa_e38631_Supplementary_File_2.docx]

| TTF combination | Neuronal fate | Reference genotype |
| --- | --- | --- |
| Hb | 1,2 | WT, const Hb, ΔHb |
| Hb,Kr | 1,2 | WT, const Hb, ΔHb |
| Kr | 3,Unknown | 3:WT, ΔHb, Unknown :this study (Fig.4E) |
| Kr,Pdm | 3 | WT,const Kr |
| Pdm | 4 | WT, ΔPdm |
| Pdm,Cas | 5,IN | 5:WT, ΔPdm, ΔCas,const Pdm, , IN :this study (Fig.4E) |
| Cas | IN | const Cas |
| Hb,Pdm | 1,2 | const Pdm |
| Kr,Cas | 3 | const Cas |
