# Supplementary material for: A repressor-decay timer for robust temporal patterning in embryonic Drosophila neuroblast lineages
Source: eLife journal article supplement (doi:10.7554/elife.38631), 2018-12-10
Supplement: supp [file elife-38631-supp-v1.zip › elife_poa_e38631_Supplementary_File_4.docx]

| Parameter | Units | Range or values |
| --- | --- | --- |
|  | [min] | 20 or 50 |
|  | [min] | 280 |
|  |  | [1, 3000] |
|  |  | 0 for WT and all perturbations except Hb deletion. [1, 1000] for Hb deletion |
|  |  | [1,800] |
|  | [1/min] | [10^-3,1] |
|  |  | [0.01,100] |
|  | C | 2 |
|  | - | 5 |
