# Supplementary figures and images for: A repressor-decay timer for robust temporal patterning in embryonic Drosophila neuroblast lineages
Source: eLife journal article supplement (doi:10.7554/elife.38631), 2018-12-10

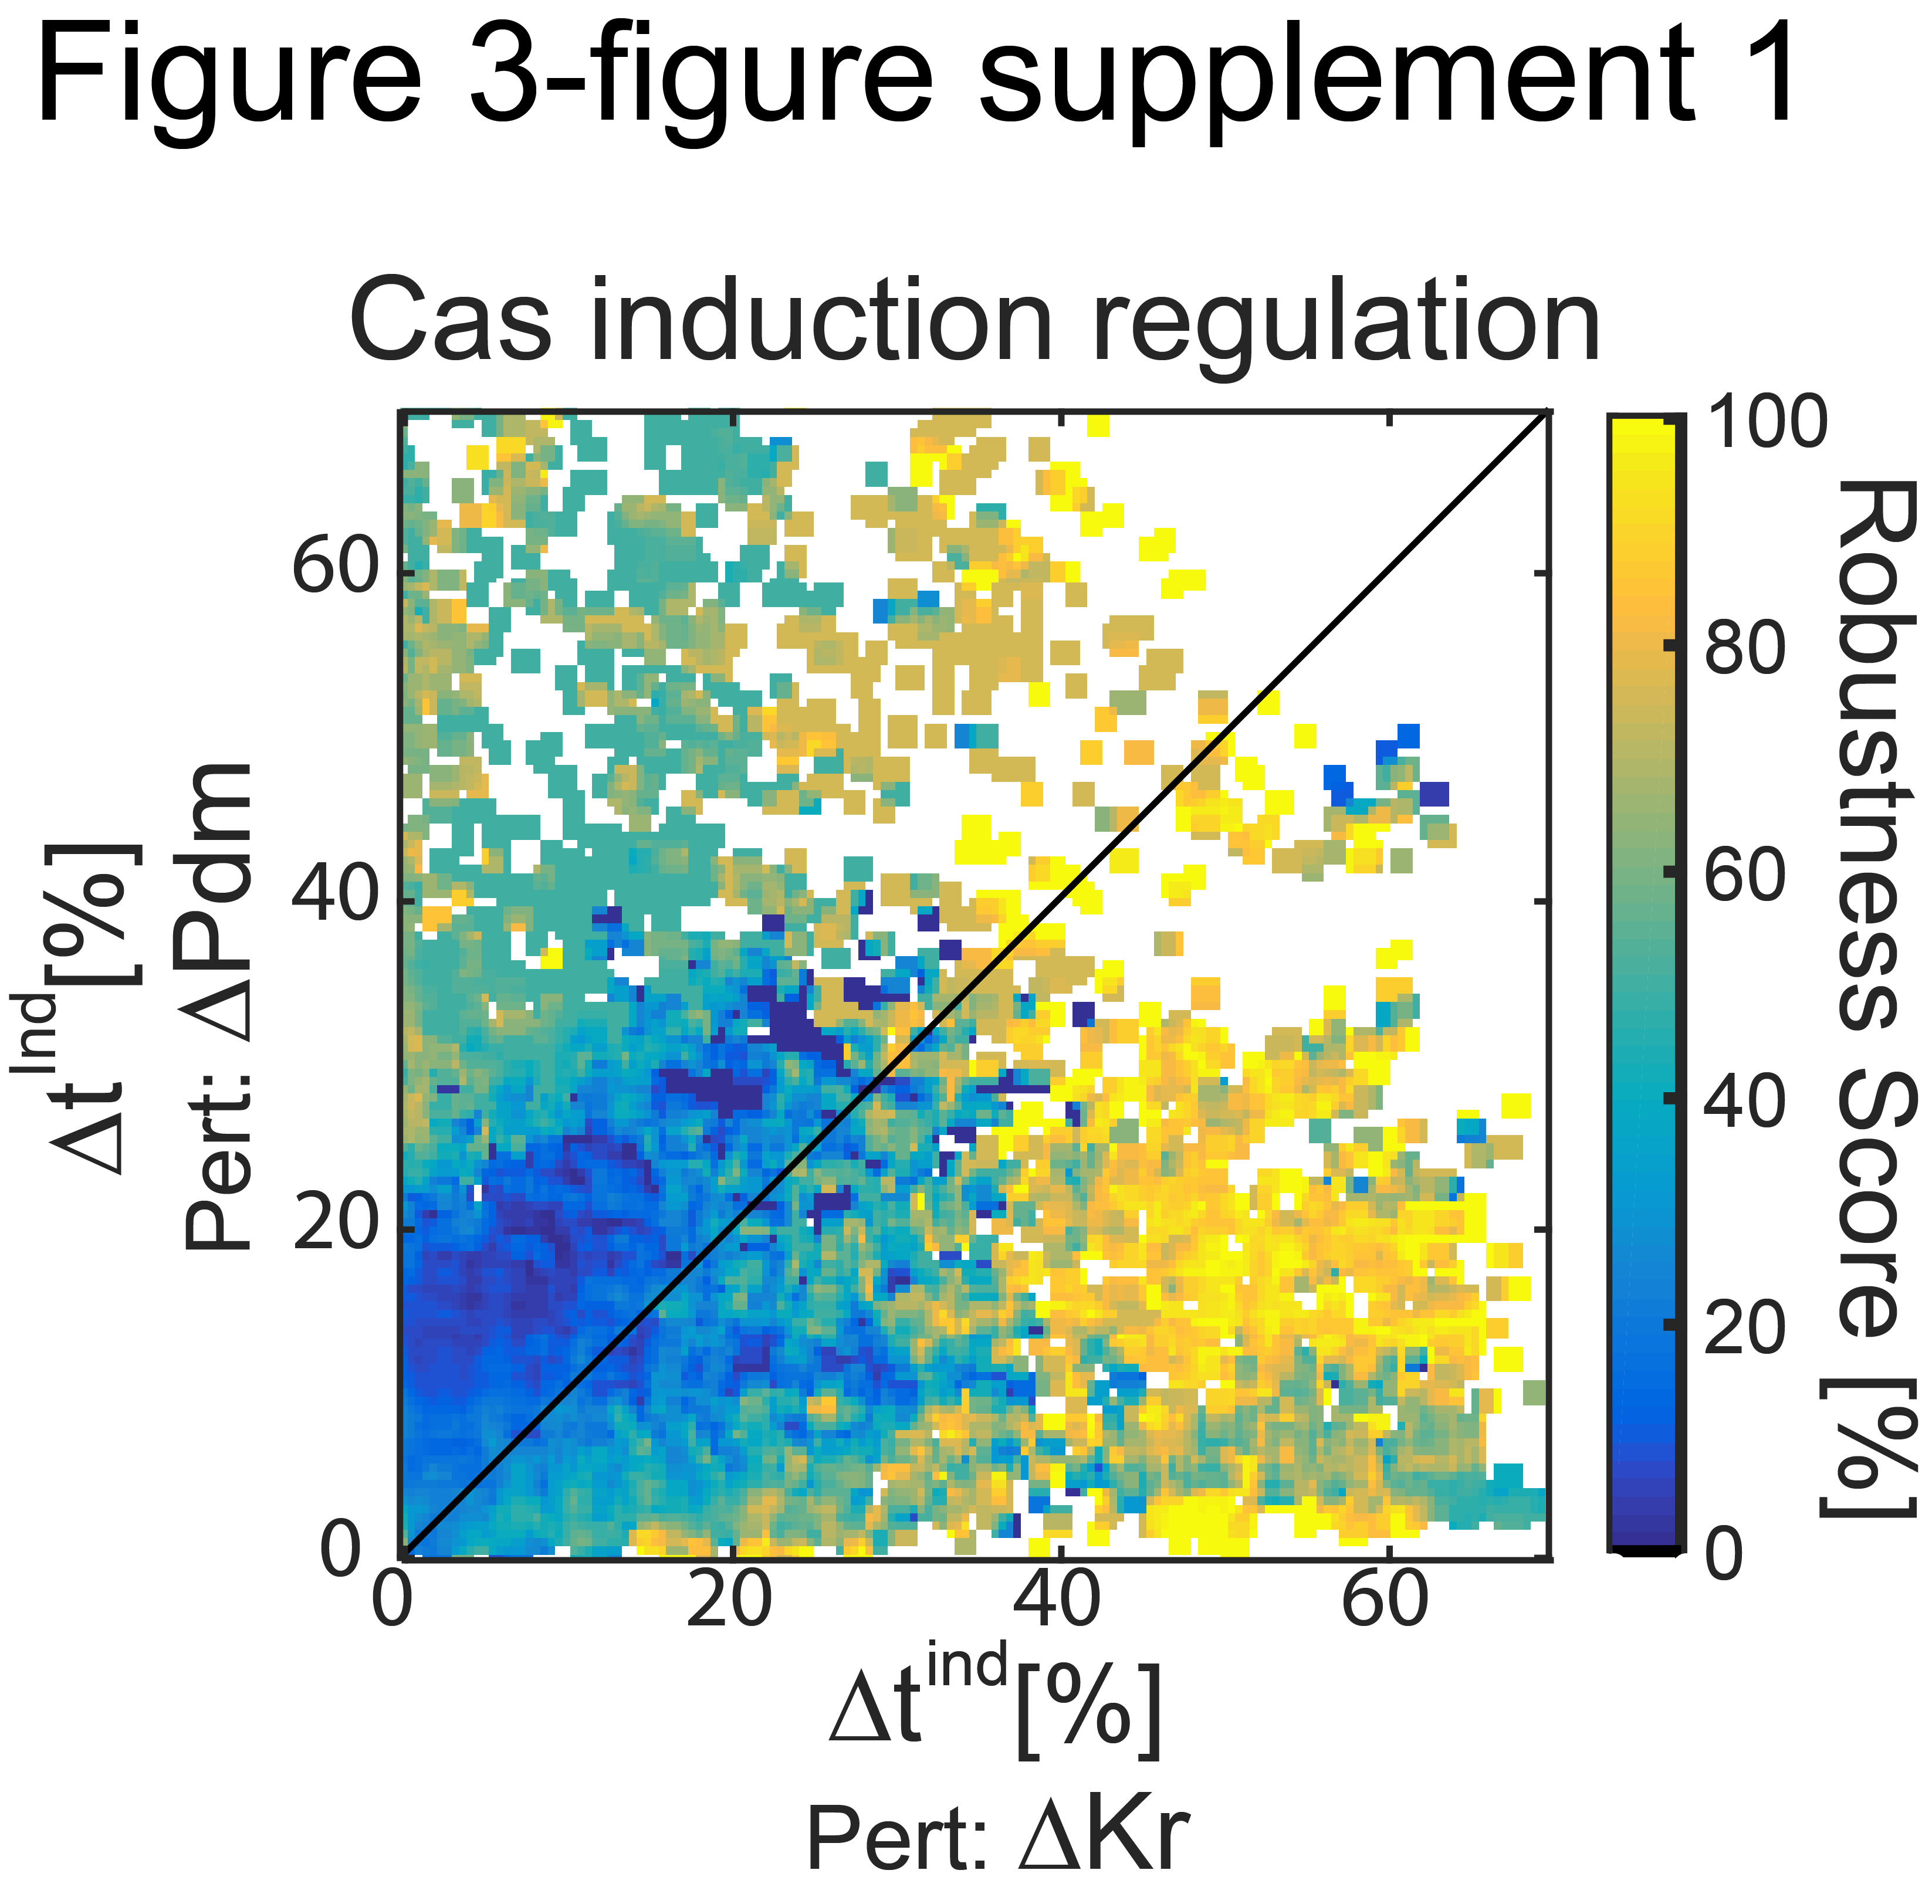

Supplement: supp [file elife-38631-supp-v1.zip › elife_poa_e38631_Figure_3_figure_supplement_1.tif]

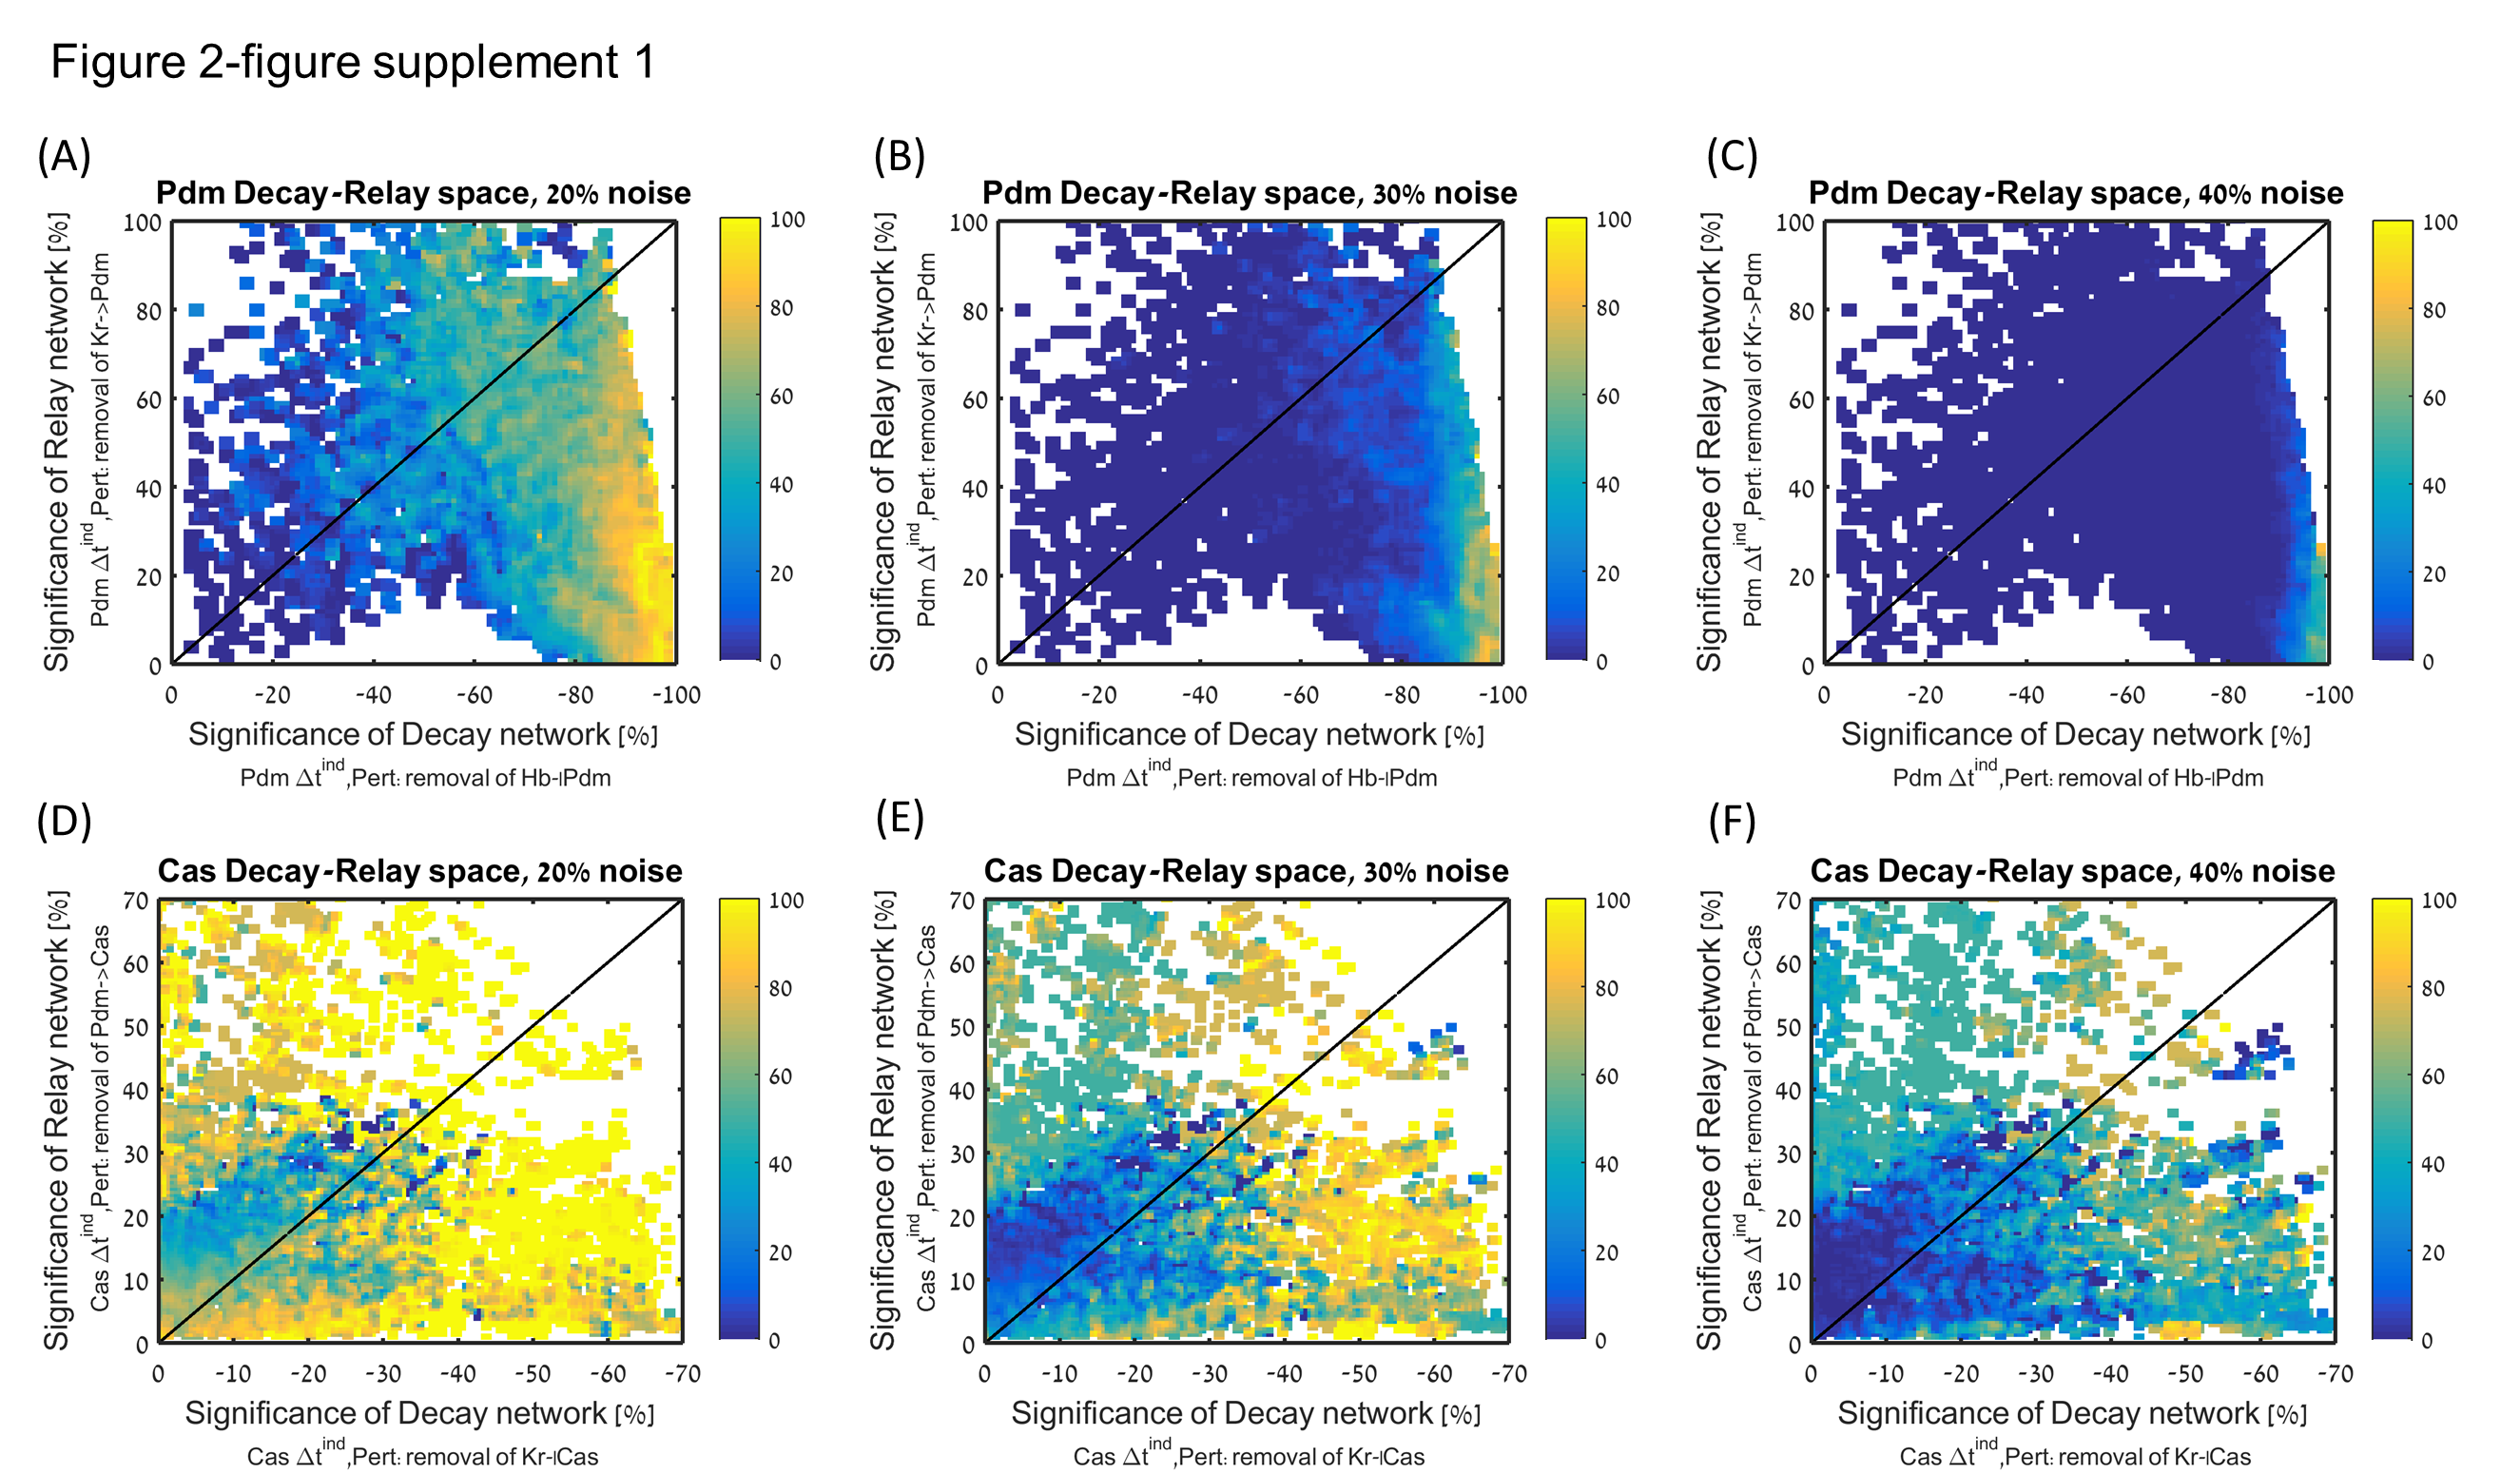

Supplement: supp [file elife-38631-supp-v1.zip › elife_poa_e38631_Figure_2_figure_supplement_1.tif]

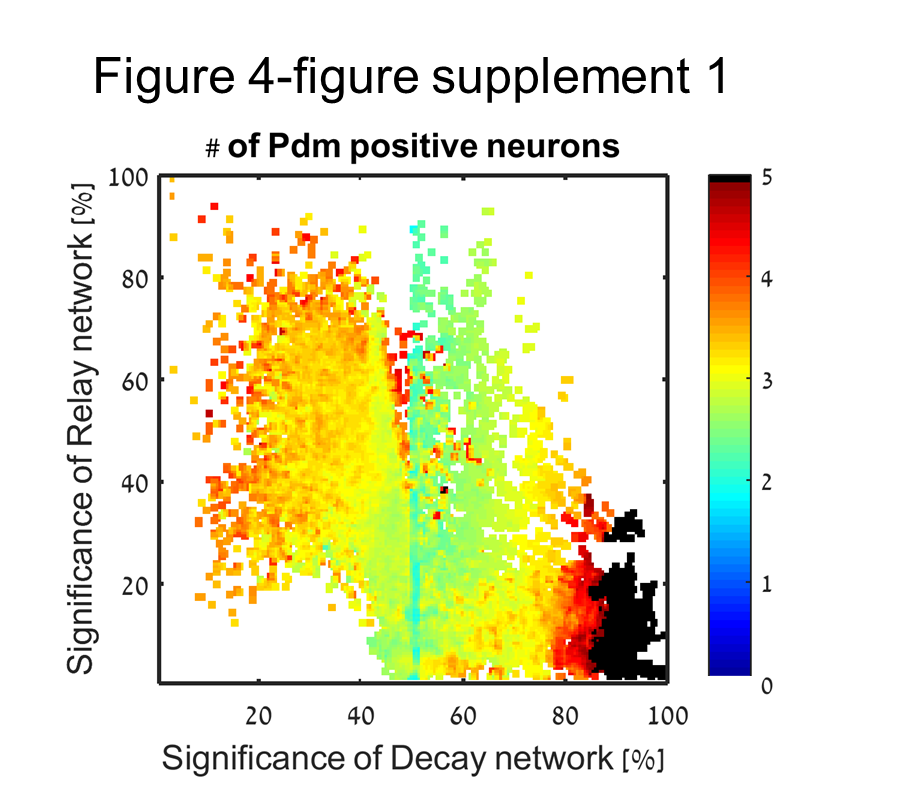

Supplement: supp [file elife-38631-supp-v1.zip › elife_poa_e38631_Figure_4_figure_supplement_1.tif]

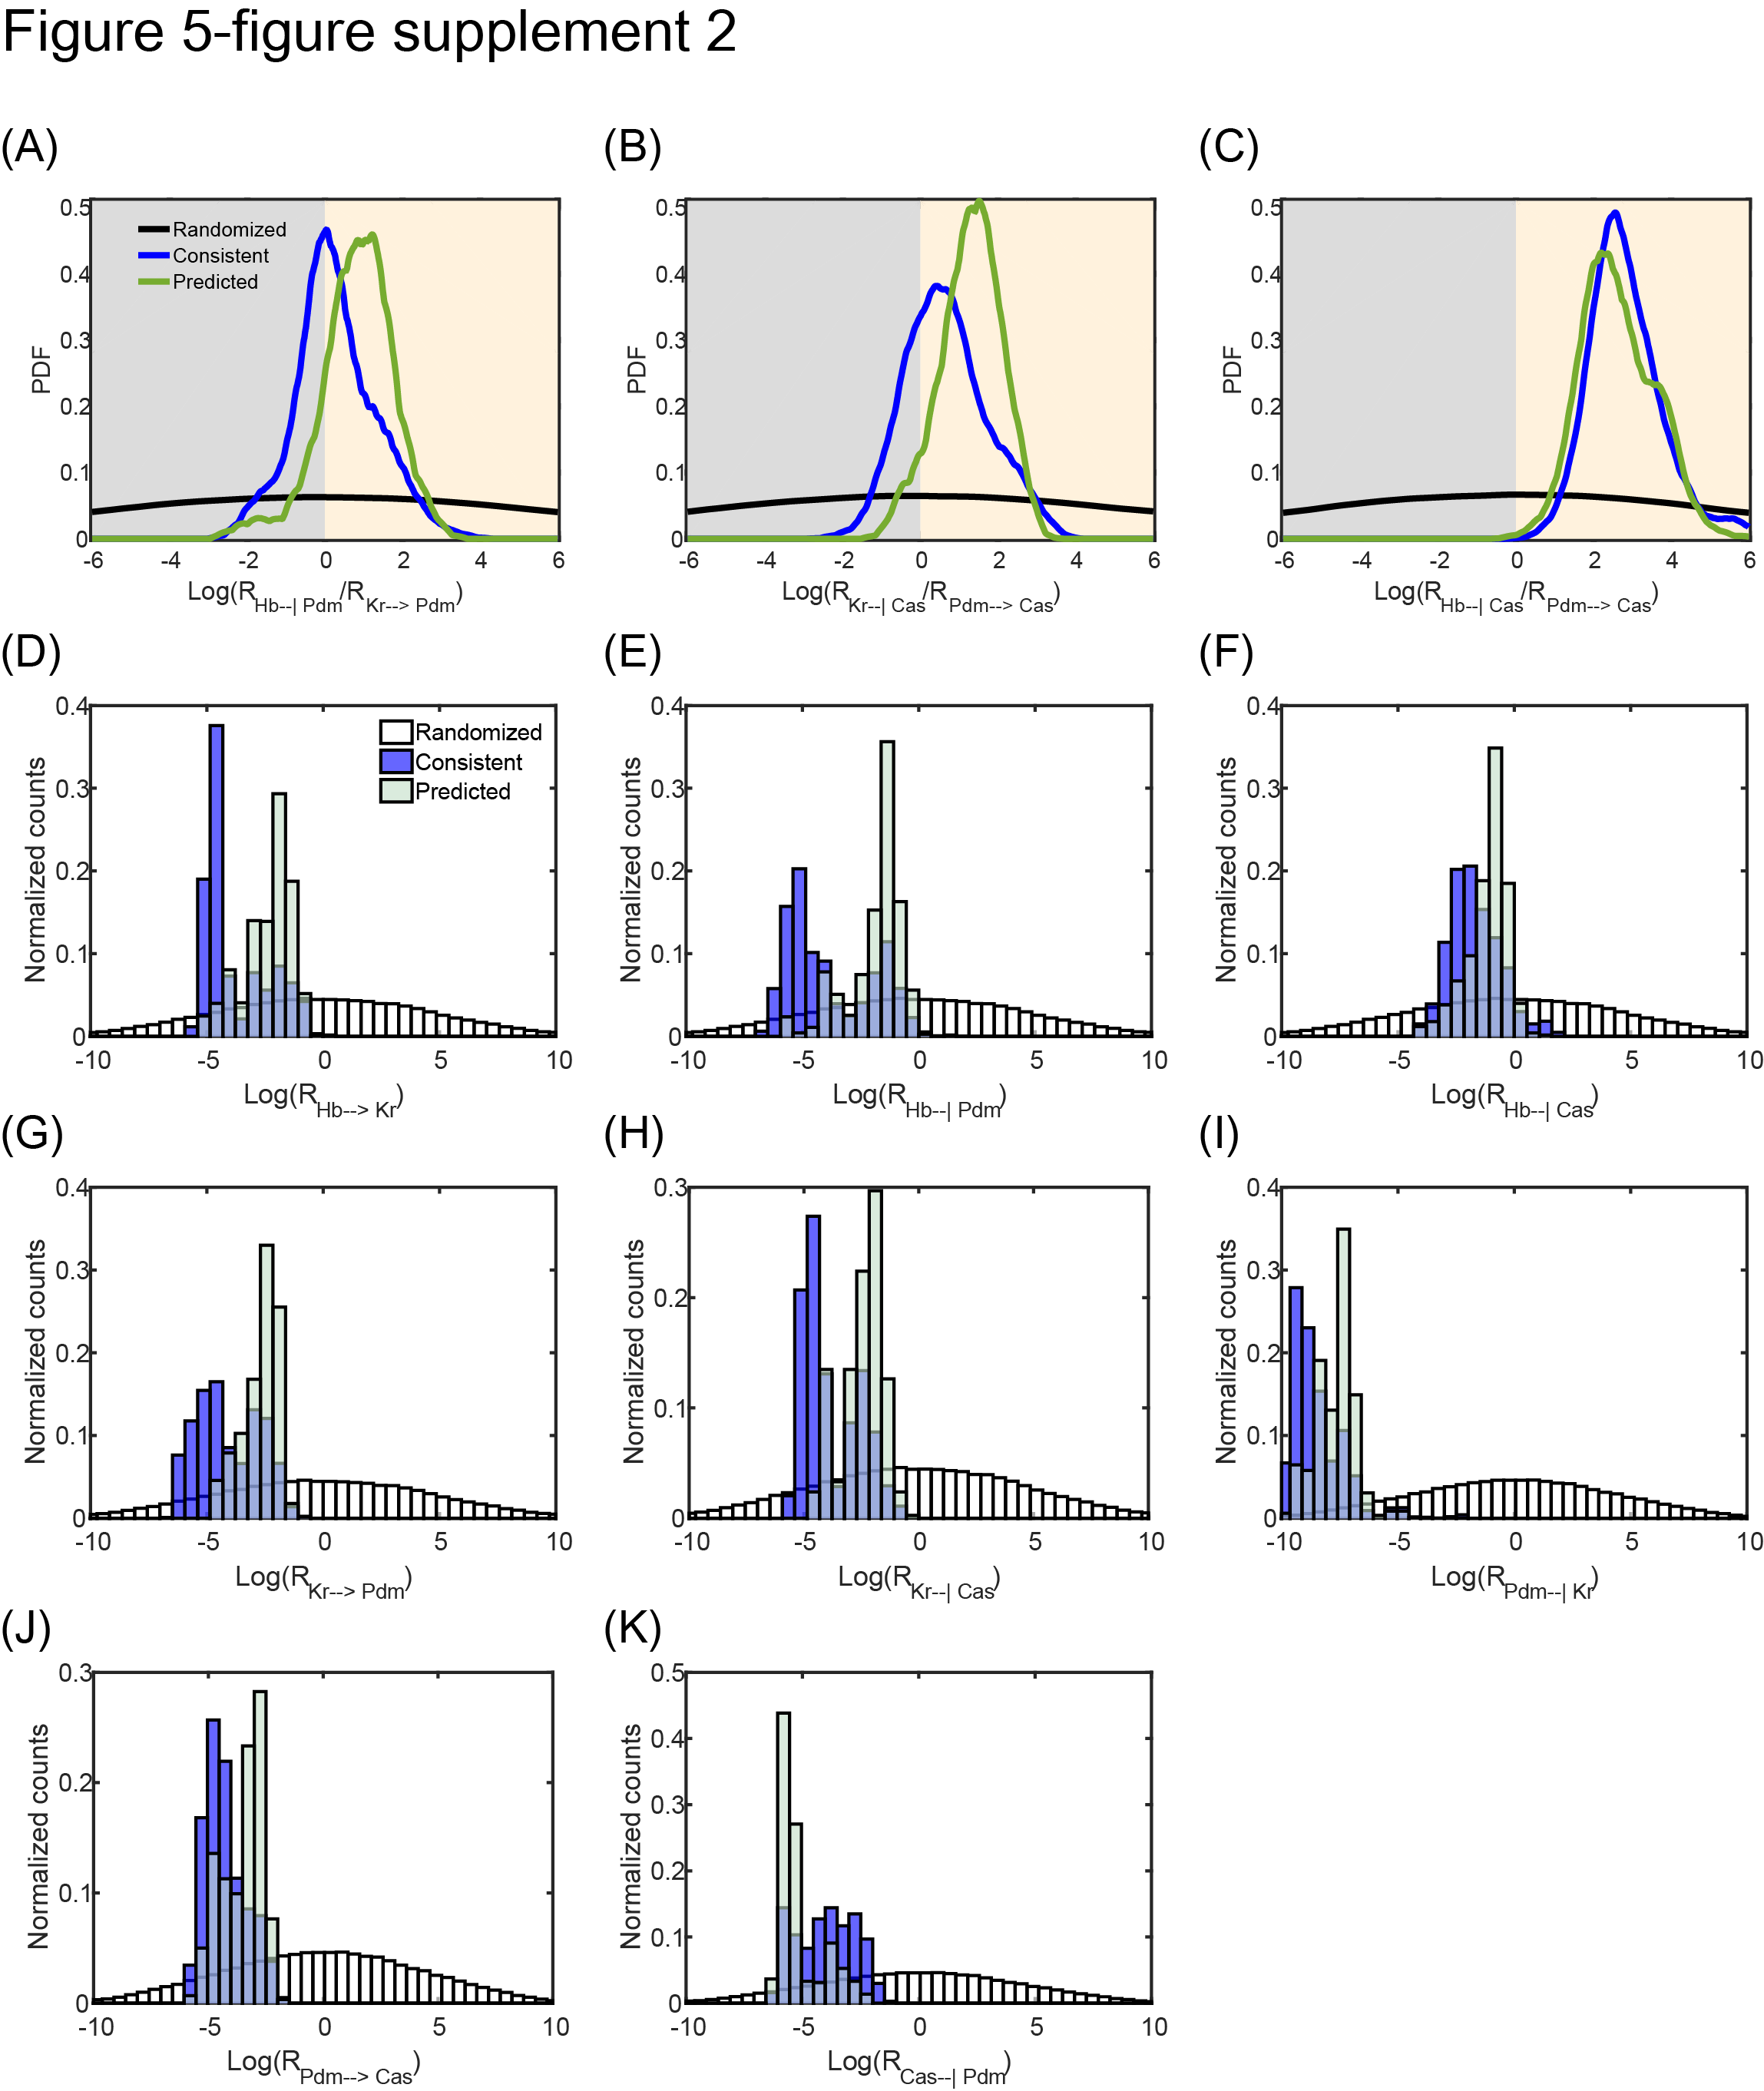

Supplement: supp [file elife-38631-supp-v1.zip › elife_poa_e38631_Figure_5_figure_supplement_2.tif]

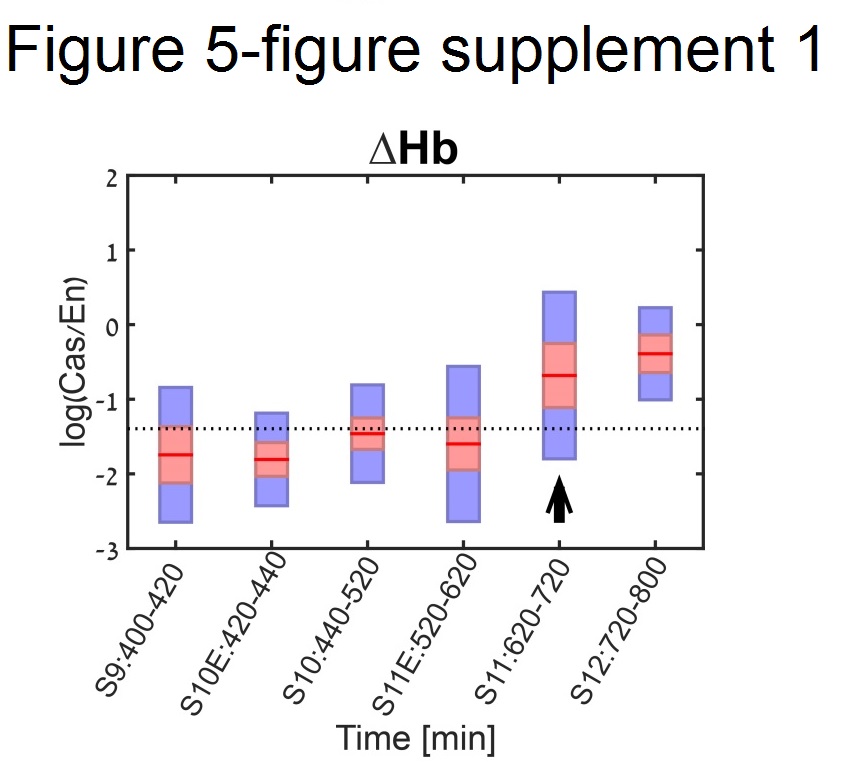

Supplement: supp [file elife-38631-supp-v1.zip › elife_poa_e38631_Figure_5_figure_supplement_1.jpg]

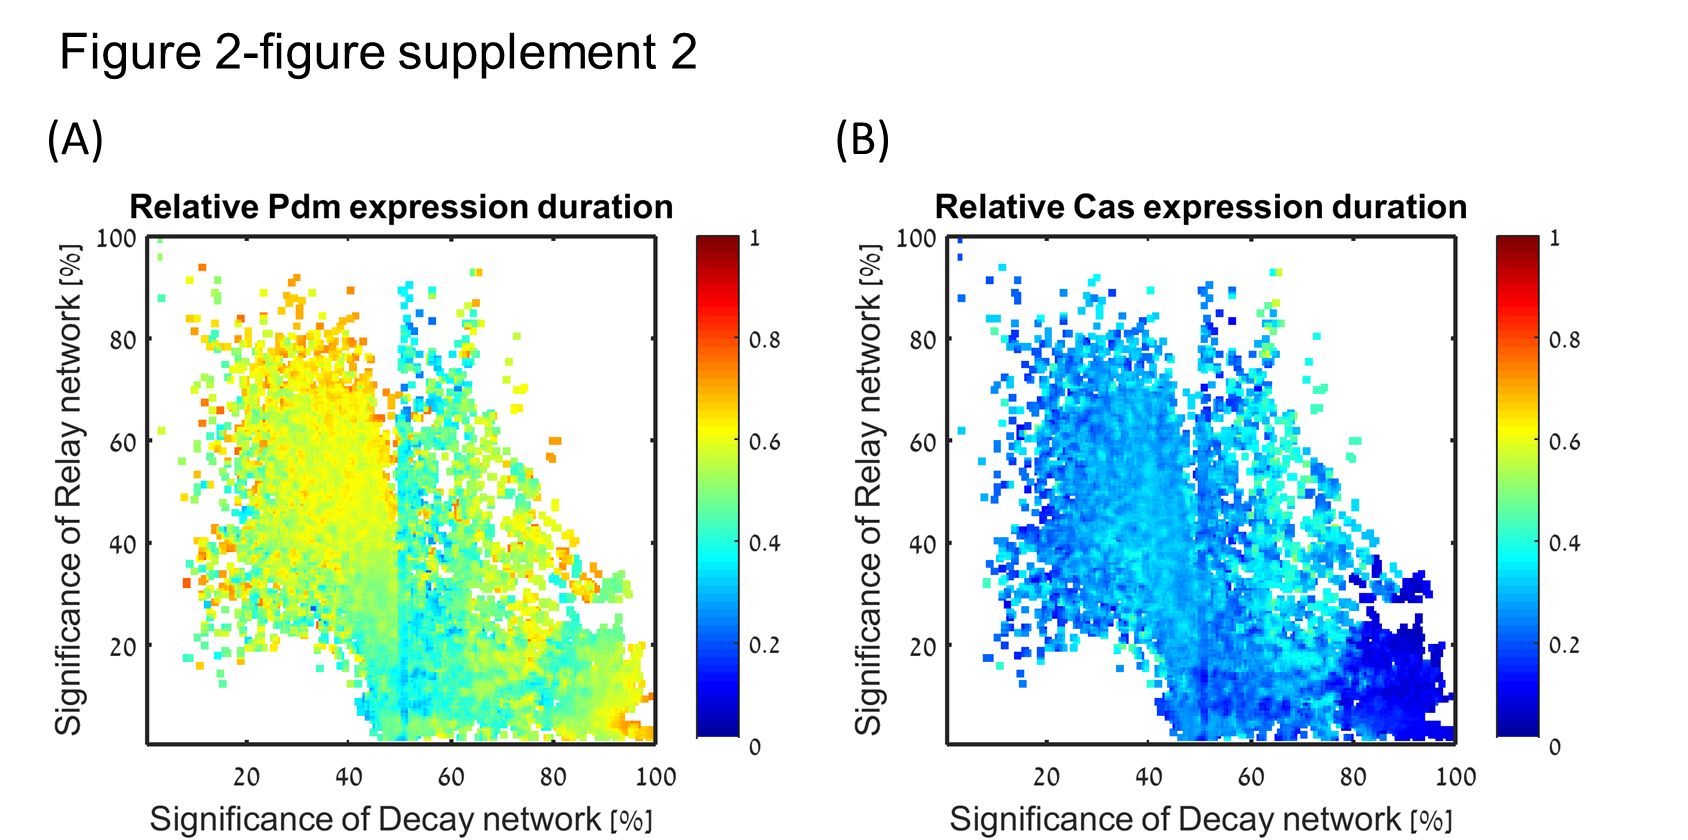

Supplement: supp [file elife-38631-supp-v1.zip › elife_poa_e38631_Figure_2_figure_supplement_2.tif]
